# Supplementary material for: Significant Joule self-heating pervasive in the emergent thin-film transistor studies
Source: Royal Society of Chemistry journal article supplement (doi:10.1039/d4tc02612h), 2024-01-01
Supplement: d4tc02612h2.pdf [file d4tc02612h2.pdf]

**TABLE: Significant Joule self-heating pervasive in the emergent thin-film transistor studies.**

V. Bruevich,<sup>1,\*</sup> Y. Patel,<sup>2</sup> J. P. Singer,<sup>2</sup> and V. Podzorov<sup>1,\*</sup>

<sup>1</sup> Dept. of Physics & Astronomy, Rutgers University, 136 Frelinghuysen Rd, Piscataway, NJ 08854, USA.

<sup>2</sup> Dept. of Mechanical & Aerospace Engineering, Rutgers University, 98 Brett Road, Piscataway, NJ 08854, USA.

\* E-mails: bruevich@physics.rutgers.edu, podzorov@physics.rutgers.edu

**TABLE S1. A few illustrative cases of field-effect transistor (FET) studies of metal-halide perovskites, conjugated polymers, and small-molecule organic semiconductors, where high power density ( $P_{\max}$ ) and/or power ( $W_{\max}$ ) have been apparently reached in the transistors' channel. Parameters, including the channel width ( $W$ ) and length ( $L$ ), the effective source-drain electric field ( $E_{\text{DS}}$ ), and the maximum source-drain current ( $|I_{\text{DS}}|^{\max}$ ), are also listed, along with the studied material and the corresponding Figure.**

$E_{\text{DS}}$  is the effective longitudinal (source-drain) electric field in a FET channel applied during the recording of transfer curves corresponding to the extracted  $W_{\max}$  and  $P_{\max}$ , defined as  $E_{\text{DS}} \equiv |V_{\text{DS}}|/L$ , where  $V_{\text{DS}}$  is the source-drain voltage applied during the measurement, and  $L$  is the channel length.

$W_{\max}$  is the maximum apparent electric power dissipated in the channel of the reported FET, calculated from the corresponding transfer curve as  $W_{\max} \equiv |I_{\text{DS}}|^{\max} \cdot |V_{\text{DS}}|$ .

$P_{\max}$  is the corresponding maximum apparent electric power density emitted in the channel, calculated from the reported transfer curve as  $P_{\max} \equiv |I_{\text{DS}}|^{\max} \cdot |V_{\text{DS}}|/(LW)$ .

For the control experiment on infra-red imaging of the surface temperature distribution of biased devices, emulating specific experimental conditions used in Ref. [1], see Supplementary video (a separate file).

| # | Reference                                                            | semiconductor                                                                                                    | Fig. | $W$<br>( $\mu\text{m}$ ) | $L$<br>( $\mu\text{m}$ ) | $ I_{\text{DS}} ^{\max}$<br>(A) | $E_{\text{DS}}$<br>( $\text{kV}\cdot\text{cm}^{-1}$ ) | $W_{\max}$<br>(W) | $P_{\max}$<br>( $\text{W}\cdot\text{cm}^{-2}$ )* |
|---|----------------------------------------------------------------------|------------------------------------------------------------------------------------------------------------------|------|--------------------------|--------------------------|---------------------------------|-------------------------------------------------------|-------------------|--------------------------------------------------|
| 1 | H. Zhu <i>et al.</i> ,<br><i>Nat. Electron.</i> (2023) <sup>1</sup>  | Hybrid tin halide perovskite, $(\text{Cs}_x\text{FA}_{1-x})\text{PEA}_2\text{Sn}_8\text{I}_{25}$ ,<br>$x = 10\%$ | 1c   | 1000                     | 200                      | 0.01                            | 2                                                     | 0.4               | 200                                              |
| 2 | A. Liu <i>et al.</i> ,<br><i>Nat. Electron.</i> (2022) <sup>2</sup>  | Tin halide perovskite, $\text{CsSnI}_3$                                                                          | 1d   | 1000                     | 150                      | $6.8 \times 10^{-3}$            | 2.67                                                  | 0.27              | 181                                              |
| 3 | W. Yang <i>et al.</i> ,<br><i>Adv. Mater.</i> (2024) <sup>3</sup>    | Hybrid tin halide perovskite, $\text{FASnI}_3$ with F-PEAI                                                       | 3i   | 1000                     | 100                      | $9 \times 10^{-3}$              | 4                                                     | 0.36              | 361                                              |
| 4 | F. Yang <i>et al.</i> ,<br><i>Org. Electron.</i> (2016) <sup>4</sup> | Conj. polymer, P2MDPP2T-DTT                                                                                      | 2c   | 1400                     | 40                       | $4.23 \times 10^{-3}$           | 25                                                    | 0.42              | 755                                              |
| 5 | Y. Ji <i>et al.</i> ,<br><i>Adv. Mater.</i> (2016) <sup>5</sup>      | Conj. polymer, PDPPMT-2T                                                                                         | 2c   | 1400                     | 40                       | $4 \times 10^{-3}$              | 25                                                    | 0.4               | 709                                              |

\* For comparison:

(a) The working surface of a typical household clothes iron emits about  $0.36 \text{ W}\cdot\text{cm}^{-2}$  at full-power operation.

(b) The integral power density emitted by the Sun at its surface is  $\sim 6.4 \text{ kW}\cdot\text{cm}^{-2}$ .

(c) The power density of a  $\text{CO}_2$  laser beam in industrial laser cutting machines for plastics, wood and leather is  $3 - 10 \text{ kW}\cdot\text{cm}^{-2}$ .

| #  | Reference                                                                          | semiconductor                                  | Fig. | W<br>( $\mu\text{m}$ ) | L<br>( $\mu\text{m}$ ) | $ I_{DS} ^{\text{max}}$<br>(A) | $E_{DS}$<br>( $\text{kV}\cdot\text{cm}^{-1}$ ) | $W_{\text{max}}$<br>(W) | $P_{\text{max}}$<br>( $\text{W}\cdot\text{cm}^{-2}$ )* |
|----|------------------------------------------------------------------------------------|------------------------------------------------|------|------------------------|------------------------|--------------------------------|------------------------------------------------|-------------------------|--------------------------------------------------------|
| 6  | Y. Diao <i>et al.</i> ,<br><i>Nat. Mater.</i> (2013) <sup>6</sup>                  | Small mol., TIPS-pentacene                     | 5b   | 1000                   | 50                     | $2\times 10^{-3}$              | 20                                             | 0.2                     | 400                                                    |
| 7  | A. Zhang <i>et al.</i> ,<br><i>Macromol.</i> (2016) <sup>7</sup>                   | Conj. polymer, PDPP4T-2M                       | 3c   | 1400                   | 50                     | $2.8\times 10^{-3}$            | 20                                             | 0.28                    | 400                                                    |
| 8  | J. Lee <i>et al.</i> ,<br><i>J. Am. Chem. Soc.</i><br>(2013) <sup>8</sup>          | Conj. polymer,<br>PTDPPSe-SiC4                 | 5d   | 1000                   | 50                     | $2.12\times 10^{-3}$           | 20                                             | 0.21                    | 424                                                    |
| 9  | H.-R. Tseng <i>et al.</i> ,<br><i>Nano Lett.</i> (2012) <sup>9</sup>               | Conj. polymer,<br>PCDTBT                       | 3c   | 1000                   | 20                     | $6.4\times 10^{-3}$            | 20                                             | 0.26                    | 1280                                                   |
| 10 | J. Mahmood <i>et al.</i> ,<br><i>Adv. Mater.</i> (2021) <sup>10</sup>              | 2D fused aromatic<br>networks<br>(43 nm-thick) | 4c   | 4                      | 0.5                    | $1.55\times 10^{-3}$           | 2                                              | $1.6\times 10^{-4}$     | 7750                                                   |
| 11 | V. K. Bandari <i>et al.</i> ,<br><i>Adv. Funct. Mater.</i><br>(2019) <sup>11</sup> | Small mol.,<br>BTBT-T <sub>6</sub>             | 4b   | 5                      | 4.4                    | $6.7\times 10^{-5}$            | 52                                             | $1.5\times 10^{-3}$     | 7052                                                   |
| 12 | J. Liu <i>et al.</i> ,<br><i>Nat. Commun.</i><br>(2015) <sup>12</sup>              | Small mol.,<br>2,6-diphenylanthracene          | 3a   | 3.3                    | 16.5                   | $9.2\times 10^{-6}$            | 36                                             | $0.6\times 10^{-3}$     | 1000                                                   |
| 13 | H. Li <i>et al.</i> ,<br><i>J. Am. Chem. Soc.</i><br>(2012) <sup>13</sup>          | C <sub>60</sub>                                | 4b   | 8.7                    | 40                     | $1.6\times 10^{-5}$            | 25                                             | $1.6\times 10^{-3}$     | 457                                                    |
| 14 | G. Giri <i>et al.</i> ,<br><i>Nature</i> (2011) <sup>14</sup>                      | Small mol.,<br>TIPS-pentacene                  | 4c   | 1000                   | 50                     | $6.25\times 10^{-4}$           | 20                                             | $62.5\times 10^{-3}$    | 125                                                    |
| 15 | H. Iino <i>et al.</i> ,<br><i>Nat. Commun.</i><br>(2015) <sup>15</sup>             | Small mol.,<br>Ph-BTBT-C <sub>10</sub>         | 3b   | 500                    | 100                    | $10^{-3}$                      | 10                                             | 0.1                     | 200                                                    |
| 16 | H.-R. Tseng <i>et al.</i> ,<br><i>Adv. Mater.</i> (2014) <sup>16</sup>             | Conj. polymer,<br>PCDTPT                       | 1c   | 1000                   | 80                     | $1.53\times 10^{-3}$           | 10                                             | 0.12                    | 153                                                    |
| 17 | C. Luo <i>et al.</i> ,<br><i>Nano Lett.</i> (2014) <sup>17</sup>                   | Conj. polymer,<br>PCDTPT                       | 4c   | 800                    | 80                     | $1.2\times 10^{-3}$            | 10                                             | 0.1                     | 150                                                    |

For the analysis of FET mobilities and the corresponding mobility reliability factors in some of these papers, see Refs. [18-21].

**ACKNOWLEDGEMENT:** VB and VP thank partial support of their research at Rutgers University via the Donald H. Jacobs Chair in Applied Physics.

#### REFERENCES:

1. H. Zhu, W. Yang, Y. Reo, G. Zheng, S. Bai, A. Liu and Y.-Y. Noh, Tin perovskite transistors and complementary circuits based on A-site cation engineering, *Nat. Electron.*, 2023, **6**, 650-657.
2. A. Liu, H. Zhu, S. Bai, Y. Reo, T. Zou, M.-G. Kim and Y.-Y. Noh, High-performance inorganic metal halide perovskite transistors, *Nat. Electron.*, 2022, **5**, 78-83.
3. W. Yang, K. Zhang, W. Yuan, L. Zhang, C. Qin and H. Wang, Enhancing stability and performance in tin-based perovskite field-effect transistors through hydrogen bond suppression of organic cation migration, *Adv. Mater.*, 2024, **36**, 2313461.

4. F. Yang, C. Li, J. Zhang, G. Feng, Z. Wei and W. Li, Methylated conjugated polymers based on diketopyrrolopyrrole and dithienothiophene for high performance field-effect transistors, *Org. Electron.*, 2016, **37**, 366-370.
5. Y. Ji, C. Xiao, Q. Wang, J. Zhang, C. Li, Y. Wu, Z. Wei, X. Zhan, W. Hu, Z. Wang, R. A. J. Janssen and W. Li, Asymmetric diketopyrrolopyrrole conjugated polymers for field-effect transistors and polymer solar cells processed from a nonchlorinated solvent, *Adv. Mater.*, 2016, **28**, 943-950.
6. Y. Diao, B. C. K. Tee, G. Giri, J. Xu, D. H. Kim, H. A. Becerril, R. M. Stoltenberg, T. H. Lee, G. Xue, S. C. B. Mannsfeld and Z. Bao, Solution coating of large-area organic semiconductor thin films with aligned single-crystalline domains, *Nat. Mater.*, 2013, **12**, 665-671.
7. A. Zhang, C. Xiao, Y. Wu, C. Li, Y. Ji, L. Li, W. Hu, Z. Wang, W. Ma and W. Li, Effect of fluorination on molecular orientation of conjugated polymers in high performance field-effect transistors, *Macromolecules*, 2016, **49**, 6431-6438.
8. J. Lee, A. R. Han, H. Yu, T. J. Shin, C. Yang and J. H. Oh, Boosting the ambipolar performance of solution-processable polymer semiconductors via hybrid side-chain engineering, *J. Am. Chem. Soc.*, 2013, **135**, 9540-9547.
9. H.-R. Tseng, L. Ying, B. B. Y. Hsu, L. A. Perez, C. J. Takacs, G. C. Bazan and A. J. Heeger, High mobility field effect transistors based on macroscopically oriented regioregular copolymers, *Nano Lett.*, 2012, **12**, 6353-6357.
10. J. Mahmood, E. K. Lee, H.-J. Noh, I. Ahmad, J.-M. Seo, Y.-K. Im, J.-P. Jeon, S.-J. Kim, J. H. Oh and J.-B. Baek, Fused aromatic network with exceptionally high carrier mobility, *Adv. Mater.*, 2021, **33**, 2004707.
11. V. K. Bandari, Y. Gu, S. Shi, Y. Nan, K. He, Y. Li, N. Bandari, S. Moradi, H. Tian, F. Zhu, Y. Geng, D. Yan and O. G. Schmidt, Fully integrated microscale quasi-2D crystalline molecular field-effect transistors, *Adv. Funct. Mater.*, 2019, **29**, 1903738.
12. J. Liu, H. Zhang, H. Dong, L. Meng, L. Jiang, L. Jiang, Y. Wang, J. Yu, Y. Sun, W. Hu and A. J. Heeger, High mobility emissive organic semiconductor, *Nat. Commun.*, 2015, **6**, 10032.
13. H. Li, B. C. K. Tee, J. J. Cha, Y. Cui, J. W. Chung, S. Y. Lee and Z. Bao, High-mobility field-effect transistors from large-area solution-grown aligned C60 single crystals, *J. Am. Chem. Soc.*, 2012, **134**, 2760-2765.
14. G. Giri, E. Verploegen, S. C. B. Mannsfeld, S. Atahan-Evrenk, D. H. Kim, S. Y. Lee, H. A. Becerril, A. Aspuru-Guzik, M. F. Toney and Z. Bao, Tuning charge transport in solution-sheared organic semiconductors using lattice strain, *Nature*, 2011, **480**, 504-508.
15. H. Iino, T. Usui and J.-i. Hanna, Liquid crystals for organic thin-film transistors, *Nat. Commun.*, 2015, **6**, 6828.
16. H.-R. Tseng, H. Phan, C. Luo, M. Wang, L. A. Perez, S. N. Patel, L. Ying, E. J. Kramer, T.-Q. Nguyen, G. C. Bazan and A. J. Heeger, High-mobility field-effect transistors fabricated with macroscopic aligned semiconducting polymers, *Adv. Mater.*, 2014, **26**, 2993-2998.

17. C. Luo, A. K. K. Kyaw, L. A. Perez, S. Patel, M. Wang, B. Grimm, G. C. Bazan, E. J. Kramer and A. J. Heeger, General strategy for self-assembly of highly oriented nanocrystalline semiconducting polymers with high mobility, *Nano Lett.*, 2014, **14**, 2764-2771.
18. V. Bruevich and V. Podzorov, *Zenodo*, 2023, <https://doi.org/10.5281/zenodo.10046994>.
19. V. Podzorov and V. Bruevich, Safe practices for mobility evaluation in field-effect transistors and Hall effect measurements using emerging materials, *Nat. Electron.*, 2024, **7**, 266-268.
20. H. H. Choi, K. Cho, C. D. Frisbie, H. Sirringhaus and V. Podzorov, Critical assessment of charge mobility extraction in FETs, *Nat. Mater.*, 2018, **17**, 2-7.
21. H. H. Choi, K. Cho, C. D. Frisbie, H. Sirringhaus and V. Podzorov, Table: Critical assessment of charge mobility extraction in field-effect transistors, *Zenodo*, 2017, <https://doi.org/10.5281/zenodo.1050699>.
